# Supplementary material for: OAT3 Participates in Drug–Drug Interaction between Bentysrepinine and Entecavir through Interactions with M8—A Metabolite of Bentysrepinine—In Rats and Humans In Vitro
Source: MDPI journal article supplement (doi:10.3390/molecules28041995), 2023-02-20
Supplement: s1 [file s1]

# Supplementary materials: OAT3 Participates in Drug-Drug Interaction between Bentysrepinine and Entecavir through Interactions with M8—A Metabolite of Bentysrepinine—In Rats and Humans In Vitro

Aijie Zhang<sup>†</sup>, Fanlong Yang<sup>†</sup>, Yang Yuan, Cai Li, Xiaokui Huo, Jing Liu, Shenzhi Zhou, Wei Li, Na Zhang, Jianfeng Liu, Shiqi Dong, Huirong Fan<sup>\*</sup>, Ying Peng<sup>\*</sup>, and Jiang Zheng<sup>\*</sup>

## Figures:

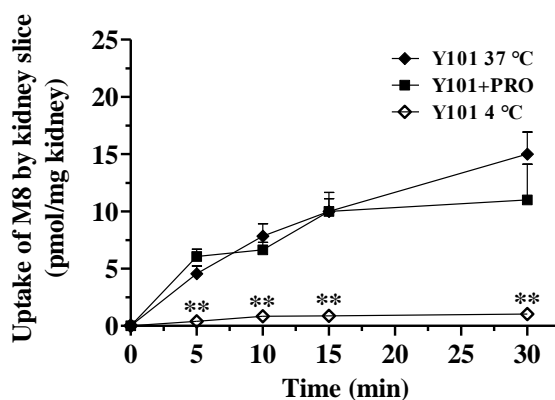

**Figure S1.** Time-dependent and temperature-dependent uptake of M8 following incubation of Y101 (2.0  $\mu$ M) in kidney slices. The concentration of PRO was 100  $\mu$ M. (\*,  $p < 0.05$ ; \*\*,  $p < 0.01$ ). Data are expressed as mean  $\pm$  SD,  $n = 3$ .
